# Supplementary material
Source: MDPI journal article supplement (https://www.mdpi.com/search?q=ijerph-17-08347)
Supplement: s001 [file ijerph-17-08347-s001.pdf]

**Supplementary Table 1.** ICD-10 codes for the clinical diagnosis and procedures used in this investigation.

| <b>Variable</b>                     | <b>ICD-10</b>                                                                                                                                                                                                                                                                                                                                                                                        |
|-------------------------------------|------------------------------------------------------------------------------------------------------------------------------------------------------------------------------------------------------------------------------------------------------------------------------------------------------------------------------------------------------------------------------------------------------|
| Valvular heart disease              | I05.X, I06.X, I07.X, I08.X, I34.X,I35.X, I36.X, I37.X                                                                                                                                                                                                                                                                                                                                                |
| Hypertension                        | I10, I16.6                                                                                                                                                                                                                                                                                                                                                                                           |
| Obesity                             | E66.X                                                                                                                                                                                                                                                                                                                                                                                                |
| Coagulopathy                        | D68.XX                                                                                                                                                                                                                                                                                                                                                                                               |
| Non-septic shock                    | R57.0, R57.1, R57.8, R57.9,                                                                                                                                                                                                                                                                                                                                                                          |
| Invasive mechanical ventilation     | 5A1945Z, 5A1955Z, 5A1935Z                                                                                                                                                                                                                                                                                                                                                                            |
| Non-invasive mechanical ventilation | 5A09357, 5A09457, 5A09557                                                                                                                                                                                                                                                                                                                                                                            |
| Thrombolytic therapy                | 3E03317, 3E04317, 3E05317, 3E06317, 3E08317                                                                                                                                                                                                                                                                                                                                                          |
| Inferior vena cava filter placement | 02HV0DZ, 02HV3DZ, 02HV4DZ, 02LV0CZ, 02LV0DZ, 02LV0ZZ, 02LV3CZ, 02LV3DZ, 02LV3ZZ, 02LV4CZ,,02LV4DZ,,02LV4ZZ,,02VV0CZ , 02VV0DZ, 02VV0ZZ, 02VV3CZ, 02VV3DZ , 02VV3ZZ, 02VV4CZ, 02VV4DZ , 02VV4ZZ , 6H00DZ, 06H03DZ , 06H04DZ , 06L00CZ, 06L00DZ , 06L00ZZ , 06L03CZ, 06L03DZ , 06L03ZZ , 06L04CZ, 06L04DZ , 06L04ZZ , 06V00CZ, 06V00DZ ,06V00ZZ , 06V03CZ, 06V03DZ, 06V03ZZ, 06V04CZ, 06V04DZ, 06V04ZZ |
| Vasopressors                        | 3E030XZ, 3E033XZ, 3E040XZ, 3E043XZ, 3E050XZ, 3E053XZ, 3E060XZ, 3E063XZ                                                                                                                                                                                                                                                                                                                               |

**Supplementary Table 2.** In-hospital mortality according to specific comorbid conditions and procedures variables among men and women with and without type 2 diabetes (T2DM) hospitalized with pulmonary embolism in Spain (2016-2018).

|                              | Men        |           |         | Women      |           |         | Both       |            |         |
|------------------------------|------------|-----------|---------|------------|-----------|---------|------------|------------|---------|
|                              | No T2DM    | T2DM      | p-value | No T2DM    | T2DM      | p-value | No T2DM    | T2DM       | p-value |
| Massive PE, n (%)            | 274(42.15) | 69(36.7)  | 0.181   | 249(37)    | 63(38.65) | 0.696   | 523(39.53) | 132(37.61) | 0.511   |
| Valvular heart disease, n(%) | 77(7.94)   | 22(11.58) | 0.103   | 100(6.49)  | 26(8.87)  | 0.142   | 177(7.05)  | 48(9.94)   | 0.028   |
| Atrial fibrillation, n (%)   | 226(14.13) | 64(16.37) | 0.260   | 246(12.19) | 80(16.63) | 0.010   | 472(13.05) | 144(16.51) | 0.008   |
| Hypertension, n(%)           | 425(6.54)  | 164(8.4)  | 0.005   | 558(6.21)  | 205(7.97) | 0.002   | 983(6.35)  | 369(8.15)  | <0.001  |
| Obesity, (n%)                | 64(4.04)   | 27(4.78)  | 0.457   | 116(4.17)  | 66(6.77)  | 0.001   | 180(4.12)  | 93(6.04)   | 0.002   |
| Coagulopathy, n(%)           | 15(4.3)    | 1(2.38)   | 0.559   | 19(6.4)    | 6(11.54)  | 0.191   | 34(5.26)   | 7(7.45)    | 0.390   |
| Undergone surgery, n(%)      | 70(18.62)  | 18(23.68) | 0.310   | 55(15.9)   | 14(28)    | 0.038   | 125(17.31) | 32(25.4)   | 0.032   |
| Thrombolytic therapy, n(%)   | 87(8.07)   | 15(8.02)  | 0.982   | 92(8.22)   | 26(11.5)  | 0.113   | 179(8.15)  | 41(9.93)   | 0.233   |
| IVC filter placement, n(%)   | 13(7.03)   | 5(17.24)  | 0.075   | 15(8.24)   | 1(3.7)    | 0.421   | 28(7.63)   | 6(10.71)   | 0.431   |

CTPA: computed tomographic pulmonary angiography. IVC: inferior vena cava. LOHS: Length on hospital stay. IHM: In-hospital mortality. The P value for the difference between patients with T2DM and No T2DM was calculated with the bivariate unconditional logistic regression model

**Supplementary Table 3.** Prevalence of thrombolytic therapy and Inferior Vena Cava (IVC) filter placement among patients hospitalized with or without massive pulmonary embolism (PE) according to sex and type 2 diabetes (T2DM) status in Spain (2016-2018).

|        |               |          | Thrombolytic therapy |            |         | IVC filter placement |           |         |
|--------|---------------|----------|----------------------|------------|---------|----------------------|-----------|---------|
|        |               |          | NO n (%)             | YES n (%)  | p-value | NO n (%)             | YES n (%) | p-value |
| Male   | No massive PE | Non T2DM | 16861(94.67)         | 950(5.33)  | 0.181   | 17647(99.08)         | 164(0.92) | 0.323   |
|        |               | T2DM     | 3193(95.23)          | 160(4.77)  |         | 3328(99.25)          | 25(0.75)  |         |
|        | Massive PE    | Non T2DM | 522(80.31)           | 128(19.69) | 0.097   | 629(96.77)           | 21(3.23)  |         |
|        |               | T2DM     | 161(85.64)           | 27(14.36)  |         | 184(97.87)           | 4(2.13)   |         |
| Female | No massive PE | Non T2DM | 19268(95.12)         | 989(4.88)  | 0.944   | 20095(99.2)          | 162(0.8)  | 0.206   |
|        |               | T2DM     | 3894(95.09)          | 201(4.91)  |         | 4070(99.39)          | 25(0.61)  |         |
|        | Massive PE    | Non T2DM | 543(80.68)           | 130(19.32) | 0.241   | 653(97.03)           | 20(2.97)  |         |
|        |               | T2DM     | 138(84.66)           | 25(15.34)  |         | 161(98.77)           | 2(1.23)   |         |
| Both   | No massive PE | Non T2DM | 36129(94.91)         | 1939(5.09) | 0.374   | 37742(99.14)         | 326(0.86) | 0.107   |
|        |               | T2DM     | 7087(95.15)          | 361(4.85)  |         | 7398(99.33)          | 50(0.67)  |         |
|        | Massive PE    | Non T2DM | 1065(80.5)           | 258(19.5)  | 0.045   | 1282(96.9)           | 41(3.1)   |         |
|        |               | T2DM     | 299(85.19)           | 52(14.81)  |         | 345(98.29)           | 6(1.71)   |         |

PE Pulmonary embolism. P values obtained using bivariate unconditional logistic regression model.

**Supplementary table 4.** Distribution and in hospital mortality (IHM) of atrial fibrillation according to its presence at admission among patients hospitalized with PE and with and without T2DM

| ATRIAL FIBRILLATION                | Distribution |             |                          | IHM        |            |                 | TOTAL POPULATION |            |                 |
|------------------------------------|--------------|-------------|--------------------------|------------|------------|-----------------|------------------|------------|-----------------|
|                                    | T2DM         | NO T2DM     | P value for distribution | T2DM       | NO T2DM    | P value for IHM | Distribution     | IHM        | P value for IHM |
| Not present on admission.<br>N (%) | 111(12.73)   | 470(12.99)  | 0.837                    | 19(17.12)  | 68(14.47)  | 0.482           | 581(12.94)       | 87(14.97)  | 0.346           |
| Present on admission<br>N (%)      | 761(87.27)   | 3148(87.01) |                          | 125(16.43) | 404(12.83) | 0.009           | 3909(87.06)      | 529(13.53) |                 |

P values obtained using bivariate unconditional logistic regression model.
